# Supplementary material for: Deletion of the moeA gene in Flavobacterium IR1 drives structural color shift from green to blue and alters polysaccharide metabolism
Source: eLife. 2026 Jan 2;14:RP105029. doi: 10.7554/eLife.105029 (PMC12758843; doi:10.7554/eLife.105029)
Supplement: Figure 4—source data 1. [file elife-105029-fig4-data1.xlsx]

## Sheet: Polysaccharides
WT																				moeA
	Day 0			Day 1			Day 2			Day 3			Day 4			Day 6					Day 0			Day 1			Day 2			Day 3			Day 4			Day 6
Agar	0.8	0.8	0.8	1	1.1	1.1	1.4	1.4	1.5	1.6	1.6	1.9	1.8	1.8	2.1	1.8	1.9	2.3		Agar	1	0.8	0.8	1	1	1	1.2	1.2	1.2	1.4	1.4	1.4	1.5	1.4	1.4	1.5	1.5	1.5
KC	1.2	1	1.3	1.3	1.1	1.4	1.6	1.5	1.7	1.9	1.7	2	2.1	1.9	2.3	2.1	2	2.4		KC	1.1	1.1	1.1	1.2	1.1	1.2	1.4	1.2	1.4	1.5	1.3	1.5	1.3	1.4	1.6	1.6	1.4	1.7
Agarose	1	1.3	1.2	1.1	1.4	1.4	1.4	1.6	1.5	1.5	1.7	1.6	1.5	1.8	1.6	1.5	1.9	1.7		Agarose	1	1.2	1.2	1	1.2	1.3	1.2	1.3	1.4	1.3	1.4	1.6	1.3	1.4	1.6	1.3	1.5	1.7
Fucoidan	1	1.2	1.1	1.2	1.3	1.3	1.3	1.4	1.4	1.4	1.4	1.5	1.4	1.4	1.6	1.5	1.9	1.6		Fucoidan	1.2	1.1	1	1.3	1.3	1.2	1.4	1.4	1.3	1.5	1.5	1.4	1.8	1.6	1.6	2.5	2.1	2.2
Cellulose	0.9	0.9	0.8	1.2	1.2	1.2	1.8	1.8	1.7	2.2	2.4	2	2.5	2.9	2.4	2.5	2.9	2.4		Cellulose	0.8	1	0.8	1	1.1	1	1.3	1.4	1.2	1.4	1.5	1.3	1.5	1.7	1.4	1.5	1.7	1.5
	Day 0			Day 1			Day 2			Day 3			Day 4			Day 6					Day 0			Day 1			Day 2			Day 3			Day 4			Day 6
	AV	SD		AV	SD		AV	SD		AV	SD		AV	SD		AV	SD				AV	SD		AV	SD		AV	SD		AV	SD		AV	SD		AV	SD
Agar	0.8	1.35974e-16		1.06667	0.057735		1.43333	0.057735		1.7	0.173205		1.9	0.173205		2	0.264575			Agar	0.866667	0.11547		1	0		1.2	0		1.4	2.71948e-16		1.43333	0.057735		1.5	0
KC	1.16667	0.152753		1.26667	0.152753		1.6	0.1		1.86667	0.152753		2.1	0.2		2.16667	0.208167			KC	1.1	0		1.16667	0.057735		1.33333	0.11547		1.43333	0.11547		1.43333	0.152753		1.56667	0.152753
Agarose	1.16667	0.152753		1.3	0.173205		1.5	0.1		1.6	0.1		1.63333	0.152753		1.7	0.2			Agarose	1.13333	0.11547		1.16667	0.152753		1.3	0.1		1.43333	0.152753		1.43333	0.152753		1.5	0.2
Fucoidan	1.1	0.1		1.26667	0.057735		1.36667	0.057735		1.43333	0.057735		1.46667	0.11547		1.66667	0.208167			Fucoidan	1.1	0.1		1.26667	0.057735		1.36667	0.057735		1.46667	0.057735		1.66667	0.11547		2.26667	0.208167
Cellulose	0.866667	0.057735		1.2	0		1.76667	0.057735		2.2	0.2		2.6	0.264575		2.6	0.264575			Cellulose	0.866667	0.11547		1.03333	0.057735		1.3	0.1		1.4	0.1		1.53333	0.152753		1.56667	0.11547
	Expansion																				Expansion
Agar	1.2		0.9	1	1.1	1	0.1													Agar	0.633333		0.5	0.3	0.6	0.466667	0.152753
KC	1																			KC	0.466667
Agarose	0.533333																			Agarose	0.366667
Fucoidan	0.566667																			Fucoidan	1.16667
Cellulose	1.73333																			Cellulose	0.7

## Sheet: agar,starch,fucoidan
WT												moeA
Diameter (cm)												Diameter (cm)
Day 0	All											Day 0	All
ASWB	1											ASWB	1
Starch	0.9											Starch	0.9
Fucoidan	1.2											Fucoidan	1.2
Day 1	1	2	3	4	5	6	7		Average	SD		Day 1	1	2	3	4	5	6	7		Average	SD
ASWB	1.1	1.2	1.1	1.1	1.2	1.2	1.1		1.14286	0.0494872		ASWB	1	1	1	1	1	1	1		1	0
Starch	1	1	1	1	1	1	1		1	0		Starch	0.9	0.9	0.9	0.9	0.9	0.9	0.9		0.9	1.11022e-16
Fucoidan	1.3	1.2	1.4	1.2	1.2	1.4	1.2		1.27143	0.0880631		Fucoidan	1.3	1.2	1.3	1.2	1.3	1.2	1.2		1.24286	0.0494872
Day 2	1	2	3	4	5	6	7		Average	SD		Day 2	1	2	3	4	5	6	7		Average	SD
ASWB	1.4	1.5	1.4	1.4	1.5	1.5	1.3		1.42857	0.0699854		ASWB	1.1	1.2	1.1	1.1	1.1	1.1	1		1.1	0.0534522
Starch	1.2	1.2	1.2	1.2	1.3	1.3	1.3		1.24286	0.0494872		Starch	1.2	1	1.1	1.2	1.1	1.1	1.1		1.11429	0.0638877
Fucoidan	1.5	1.4	1.5	1.4	1.4	1.5	1.3		1.42857	0.0699854		Fucoidan	1.5	1.3	1.4	1.4	1.5	1.3	1.3		1.38571	0.0832993
Day 3	1	2	3	4	5	6	7		Average	SD		Day 3	1	2	3	4	5	6	7		Average	SD
ASWB	1.7	1.8	1.7	1.6	1.7	1.8	1.6		1.7	0.0755929		ASWB	1.2	1.4	1.3	1.2	1.2	1.2	1.1		1.22857	0.0880631
Starch	1.7	1.6	1.7	1.7	1.9	1.9	1.9		1.77143	0.116058		Starch	1.5	1.3	1.4	1.4	1.4	1.4	1.4		1.4	0.0534522
Fucoidan	1.7	1.4	1.6	1.5	1.5	1.6	1.4		1.52857	0.103016		Fucoidan	1.6	1.4	1.6	1.5	1.6	1.4	1.4		1.5	0.092582
Day 6	1	2	3	4	5	6	7		Average	SD		Day 6	1	2	3	4	5	6	7		Average	SD
ASWB	2.1	2.3	2.2	2.3	2.1	2.3	2		2.18571	0.112486		ASWB	1.5	1.9	1.6	1.4	1.5	1.4	1.5		1.54286	0.159079
Starch	3.9	2.7	3.2	2.9	4	4.1	3.7		3.5	0.520988		Starch	2.3	1.9	2	2.1	2.3	2.1	2.3		2.14286	0.14983
Fucoidan		1.9	2.4	2.1	1.9	2.2	1.8		2.05	0.206155		Fucoidan		1.9	2.1	2.2	2.3	1.9	1.9		2.05	0.160728
Day 7	1	2	3	4	5	6	7		Average	SD		Day 7	1	2	3	4	5	6	7		Average	SD
ASWB	2.1	2.5	2.1	2.1	2.2	2.3	2.1		2.2	0.141421		ASWB	1.6	2	1.7	1.5	1.5	1.5	1.5		1.61429	0.172615
Starch	4.9	3.1	3.5	3.3	4.6	5	4.6		4.14286	0.749966		Starch	2.7	2.2	2.2	2.4	2.5	2.5	2.9		2.48571	0.235606
Fucoidan		1.9	3	2.3	2.1	2.5	2		2.3	0.369685		Fucoidan		2	3.1	2.5	2.5	2	2		2.35	0.403113
Day 8	1	2	3	4	5	6	7		Average	SD		Day 8	1	2	3	4	5	6	7		Average	SD
ASWB	2.1	2.5	2.1	2.1	2.2	2.3	2.1		2.2	0.141421		ASWB	1.6	2	1.6	1.5	1.5	1.6	1.5		1.61429	0.16413
Starch	5.8	3.4	4	3.6	5.3	5.8	5.4		4.75714	0.973737		Starch	3	2.6	2.5	2.6	2.9	2.7	3.1		2.77143	0.211891
Fucoidan		2	3.7	2.6	2.3	2.6	2.3		2.58333	0.539804		Fucoidan		2.2	3.2	2.6	2.6	2.1	2.1		2.46667	0.390157
Day 9	1	2	3	4	5	6	7		Average	SD		Day 9	1	2	3	4	5	6	7		Average	SD
ASWB	2.2	2.5	2.1	2.1	2.2	2.4	2.1		2.22857	0.148461		ASWB	1.6	2.1	1.6	1.5	1.5	1.5	1.5		1.61429	0.203038
Starch	6.8	3.7	5.1	3.8	6	6.3	6.1		5.4	1.14393		Starch	3.5	2.7	2.8	2.9	2.9	2.8	3.7		3.04286	0.361967
Fucoidan		2.1	4	2.8	2.4	2.7	2.6		2.76667	0.596285		Fucoidan		2.3	3.3	2.6	2.7	2.2	2.2		2.55	0.386221
									Average	SD											Average	SD
ASWB	1.1	1.3	1.2	1.3	1.1	1.3	1		1.18571	0.112486		ASWB	0.5	0.9	0.6	0.4	0.5	0.4	0.5		0.542857	0.159079
Starch	3	1.7	2.2	1.9	3	3.1	2.7		2.51429	0.532993		Starch	1.4	1	1.1	1.2	1.4	1.2	1.4		1.24286	0.14983
Fucoidan		0.7	1.2	0.9	0.7	1	0.6		0.85	0.206155		Fucoidan		0.7	0.9	1	1.1	0.7	0.7		0.85	0.160728
	0	1	2	3	6	7	8	9		cm/day			0	1	2	3	6	7	8	9		cm/day
ASWB	1	1.14286	1.42857	1.7	2.18571	2.2	2.2	2.23		0.136667		ASWB	1	1	1.1	1.22857	1.54286	1.61429	1.61429	1.61429		0.0877551
Starch	0.9	1	1.24286	1.77143	3.5	4.14286	4.75714	5.4		0.5		Starch	0.9	0.9	1.11429	1.4	2.14286	2.48571	2.77143	3.04286		0.238095
Fucoidan	1.2	1.27143	1.42857	1.52857	2.05	2.3	2.58333	2.76667		0.174074		Fucoidan	1.2	1.24286	1.38571	1.5	2.05	2.35	2.46667	2.55		0.15

## Sheet: Paper
	WT	moeA						WT		moeA
ASWB	1.2	0.5						Average	SD	Average	SD
KC	0.9	0.4					ASWB	1.18571	0.112486	0.542857	0.159079
Starch	2.6	1.2					ASWBKC	1	0.1	0.466667	0.152753
Fucoidan	0.8	0.8					ASWBS	2.51429	0.532993	1.24286	0.14983
Low	2.4	1.5					ASWBF	0.85	0.206155	0.85	0.160728
MM	4.3	1.6					ASWBLow	2.83333	0.152753	1.83333	0.152753
							MM	5.06667	0.416333	2.35	0.353553
